# Supplementary material for: Evolution of continental temperature seasonality from the Eocene greenhouse to the Oligocene icehouse - A model-data comparison
Source: Copernicus journal article supplement (doi:10.5194/cp-2021-27), 2021-04-01
Supplement: Supplementary file 1 [file cp-2021-27-supplement-version4.zip]

## Sheet: Supporting Table S1
SUPPORTING MATERIAL, TOUMOULIN ET AL. 2022, CLIMATE OF THE PAST
Citation: Toumoulin, A., Tardif, D., Donnadieu, Y., Licht, A., Ladant, J.-B., Kunzmann, L., and Dupont-Nivet, G.: Evolution of continental temperature seasonality from the Eocene greenhouse to the Oligocene icehouse - A model-data comparison. 2022. Climate of the Past
Supporting Table S1 – Proxy-data temperature seasonality changes (∆MATR) compilation
Note. “Id” are the study numbers shown in Figure 8. Abbreviations: CA, Coexistence Approach; CLAMP: Climate Leaf Analysis Multivariate Program; Paleolon: paleolongitude; Paleolat.: Paleolatitude; MAT: initial Mean Annual Temperature (°C), MATR: initial Mean Annual Temperature Range (°C); ∆MAT: average Mean Annual Temperature changes (°C); ∆CMMT: average Coldest Month Mean Temperature changes (°C)…
Id	Study	Method	Stages compared	Paleolon	Paleolat	MAT	MATR	∆MAT	∆CMMT	∆WMMT	∆MATRmin	∆MATRmax	∆MATR	∆GROWSEAS	Comment
a	Budantsev, 1997	Paleobotany	Priabonian - Ypresian / Lutetian ?	152.14	60.2	na	na	na	decrease	na	na	na	increase	na	qualitative data, not taken into account for statistics
b	Utescher et al., 2015	CA	Priabonian - Lutetian	129.06	43.62	18.1	18.1	-0.75	-0.3	-0.05	-3.63	4.13	0.25	0
c	Quan et al., 2012	CA	Priabonian - Lutetian	128.08	43.1	17.45	20.4	0.7	2.55	0.1	-4.475	-0.425	-2.45	2
d	Quan et al., 2012	CA	Priabonian - Lutetian	121.19	41.73	15.47	20.55	2.68	4.8	2.2	-5.16667	-0.0333333	-2.6	2.67
e	Kayseri-Ozer, 2013	CA	Priabonian - Lutetian	32.35	35.12	20.25	12.72	1.38	1.82	0.47	-1.35	1.70833	-1.35	0.67
f	Li et al., 2014	Paleobotany	Priabonian - Ypresian / Lutetian ?	108.69	19.25	na	na	na	decrease	na	na	na	increase	na	qualitative data, not taken into account for statistics
g	Quan et al., 2012	CA	Oligocene - Lutetian	124.51	44.59	17	17.45	-2.15	-2.28	-0.18	0.025	4.175	2.1	-1
h	Kayseri-Ozer, 2013	CA	Rupelian - Lutetian	28.3	33.59	18.15	16.13	-0.29	-0.99	0.73	-1.5975	5.0475	1.73	-0.7
i	Mosbrugger et al., 2005; Teodoridis et Kvaček, 2015; Moraweck et al., 2019	CA	Rupelian - Bartonian	11.79	49.51	18.44	15.18	-1.42	-2.75	-0.47	-0.56625	5.58625	2.51	-1.2
j	Wolfe et al.. 1992	CLAMP	Rupelian - Bartonian	-110.04	48.93	> 16,00	<10,00°C to <14,00°C	na	na	na	5	9	7	na
k	Kohn et al., 2015	d18O	Rupelian - Bartonian	-57.86	-45.91	16	13	na	0	na	na	na	0	na
1	Eldrett et al., 2009	CA	Rupelian - Priabonian	1.74	65.93	12.6	16.79	-2.19	-4.09	-2.55	-2.78692	5.85897	1.54	-0.82
2	Pound and Salzmann, 2017; samples 88/89	CA	Rupelian - Priabonian	153.28	61.62	13.65	21.4	0.8	0.35	-1.3	-4.625	1.325	-1.65	0
3	Zanazzi et al., 2015	d18O	Rupelian - Priabonian	-97.04	53.63	na	21.7	na	na	na	na	na	15.6	na
4	Pound and Salzmann, 2017; samples 272/273	CA	Rupelian - Priabonian	20.11	52.07	13.65	21.15	0	0	0	-3.25	3.25	0	0	qualitative data, not taken into account for statistics
5	Pound and Salzmann, 2017; samples 274/275	CA	Rupelian - Priabonian	20.21	52.07	13.65	19.8	-2.1	-1.3	1.35	-1.925	7.225	2.65	0
6	Pound and Salzmann, 2017; samples 86/87	CA	Rupelian - Priabonian	11.6	49.71	17.4	18	-0.1	0	0	-1	1	0	0	qualitative data, not taken into account for statistics
7	Teodoridis et Kvaček, 2015; Moraweck et al., 2019	CA	Rupelian - Priabonian	14.12	49.28	18.53	15.57	-1.53	-2.3	-0.12	-0.335	4.705	2.19	-1.83
8	Hren et al., 2013	∆47	Rupelian - Priabonian	-1.17	48.91	24	na	-6	na	na	na	na	increase	-4
9	Pound and Salzmann, 2017; samples 264/265	CA	Rupelian - Priabonian	-114.54	48.16	18.9	15.35	0	0	0	-2.15	2.15	0	0
10	Pound and Salzmann, 2017; samples 31/32	CA	Rupelian - Priabonian	36.19	47.44	17.7	17.85	0	-2.2	0	-0.55	4.95	2.2	0
11	Zanazzi et al., 2007	d18O	Rupelian - Priabonian	-92.19	46.24	21	21 ,90	-7.9	na	na	na	na	0	na
12	Wolfe et al., 1994	CLAMP	Rupelian - Priabonian	-113.2	45	19.1	16	-6.1	-9	-3.2	4.8	6.8	5.8	-5
13	Joomun et al., 2010	Morpho.	Rupelian - Priabonian	-0.03	42.88	na	na	na	decrease	na	na	na	increase	na
14	Utescher et al., 2015	CA	Rupelian - Priabonian	128.1	42.8	18.1	18.1	-2.8	-2.2	0.35	1.025	4.075	2.55	-2
15	Tanrattana et al., 2020	CLAMP	Rupelian - Priabonian	3.19	41.55	19	11.52	-2.76	-7.4	0.94	1.84	14.84	8.34	0 to 3,0
16	Pound and Salzmann, 2017; samples 270/269	CA	Rupelian - Priabonian	-1.43	39.98	19.25	12.35	-0.8	-0.55	0.4	-1.275	3.175	0.95	0
17	Tosal et al., 2019	CLAMP	Rupelian - Priabonian	0.96	39.86	19.46	15.72	-2.65	-3.29	-1.46	-4.27	7.93	1.83	0 to -3,3
18	Bozukov et al., 2009	CA	Rupelian - Priabonian	23.35	39.72	18.35	15.05	0.16	0.85	0.06	-1.965	0.385	-0.79	0
19	Pound and Salzmann, 2017; samples 73/74	CA	Rupelian - Priabonian	114.9	39.16	17.1	17.55	-0.2	-0.4	0	-1.75	2.55	0.4	0
20	Pound and Salzmann, 2017; samples 90/91	CA	Rupelian - Priabonian	111.04	39	20.8	14.3	-0.25	0	0	-1.4	1.4	0	0
21	Kayseri-Ozer, 2013	CA	Rupelian - Priabonian	32.13	34.99	21.63	11.37	-4.96	-9.08	-1.98	3.3625	10.8542	7.11	-2
22	Wade et al., 2012	Mg/Ca	Rupelian - Priabonian	-77.57	33.98	33	na	-7.2	lower	na	na	na	4	na
23	Pound and Salzmann, 2017; samples 202/230	CA	Rupelian - Priabonian	-85.97	33.82	20.25	14.2	-1.35	1.65	-0.45	-4.7	0.5	-2.1	0
24	Ivany et al.. 2000	d18O	Rupelian - Priabonian	-80.99	31.66	na	5	na	-2.5	na	na	na	4	na
25	Pound and Salzmann, 2017; samples 66/67	CA	Rupelian - Priabonian	-62.51	6.57	27.05	3.2	-0.1	0	-0.05	-1.725	1.625	-0.05	0
26	Pound and Salzmann, 2017; samples 316/317 (ocean)	CA	Rupelian - Priabonian	115.86	-7.16	22.3	6	3.9	2.4	2.55	-3.18	3.48	0.15	0	uncertain land provenance, not taken into account for statistics, indicated by * on Fig.4
27	Pound and Salzmann, 2017; samples 318/319 (ocean)	CA	Rupelian - Priabonian	116.13	-7.64	22.75	5.35	-0.45	-1.25	0	-4.58	7.08	1.25	0	uncertain land provenance, not taken into account for statistics, indicated by * on Fig.4
28	Pocknall, 1989	Paleobotany	Rupelian - Priabonian	-170.91	-51.95	na	na	na	0	na	na	na	0	na
29	Pocknall, 1989	Paleobotany	Rupelian - Priabonian	-168.12	-53.09	na	na	na	0	na	na	na	0	na
30	Nott and Owen, 1992	Paleobotany	Rupelian - Priabonian	154.34	-56.92	na	na	na	0	na	na	na	0	na
31	Pound and Salzmann, 2017; samples 251, 249 / 252, 250	CA	Rupelian - Priabonian	153.03	-61.34	15.5	15.97	-0.9	0.93	-1.2	-3.9125	-0.3375	-2.125	0
32	Pound and Salzmann, 2017; samples 253/254	CA	Rupelian - Priabonian	153.83	-61.42	14.6	13.4	-1.05	-2.15	-1	-0.575	2.875	1.15	-2
33	Pound and Salzmann, 2017; samples 255/256	CA	Rupelian - Priabonian	154.04	-61.71	13.55	15.35	1.5	-2.05	-2.75	-5.25	3.85	-0.7	2
34	Pound and Salzmann, 2017; samples 325/327 (ocean)	CA	Rupelian - Priabonian	160.73	-65.48	10.2	14.4	2.75	0.6	0	-6.4	5.2	-0.6	0	uncertain land provenance, not taken into account for statistics, indicated by * on Fig.4
35	Pound and Salzmann, 2017; samples 321/323 (ocean)	CA	Rupelian - Priabonian	150.67	-65.49	12.5	15.35	0	0	0	-5.15	5.15	0	0	uncertain land provenance, not taken into account for statistics, indicated by * on Fig.4
